# Supplementary material
Source: Springer Nature journal article supplement (https://www.springermedizin.de/resource/supplementary/13256_2010_1498_MOESM2_ESM.pdf/9647776)
Supplement: MOESM2 [file 9647776]

# sitagliptin

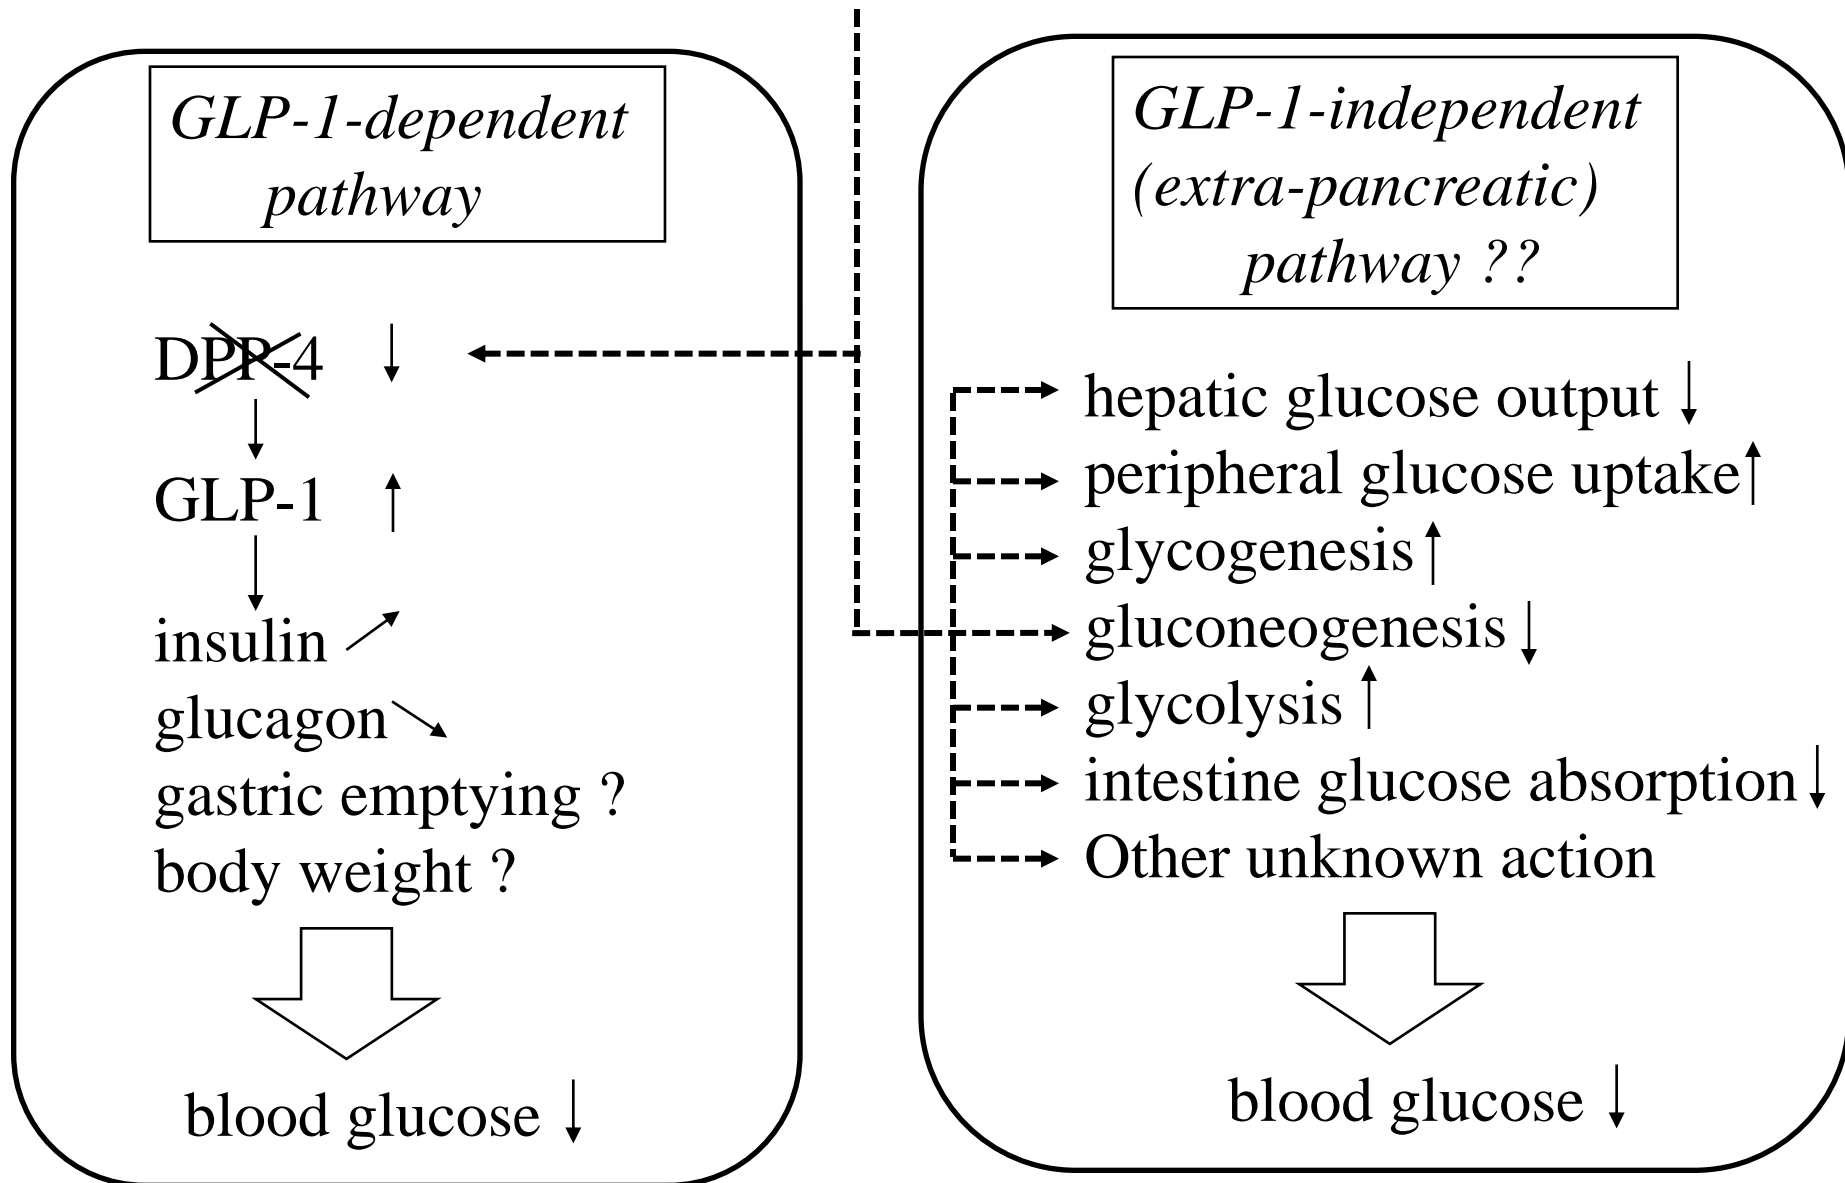

*GLP-1-dependent pathway*

~~DPP-4~~ ↓

GLP-1 ↑

insulin ↗

glucagon ↘

gastric emptying ?

body weight ?

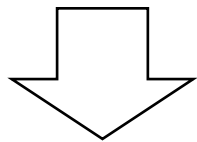

blood glucose ↓

*GLP-1-independent (extra-pancreatic) pathway ??*

hepatic glucose output ↓

peripheral glucose uptake ↑

glycogenesis ↑

gluconeogenesis ↓

glycolysis ↑

intestine glucose absorption ↓

Other unknown action

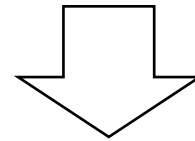

blood glucose ↓
